# Supplementary material for: Unraveling chromosomal and genotoxic damage in individuals occupationally exposed to coal from underground mining
Source: PubMed Central journal article supplement (PMC11254797; doi:10.3389/fgene.2024.1422938), 2024-07-04

**A**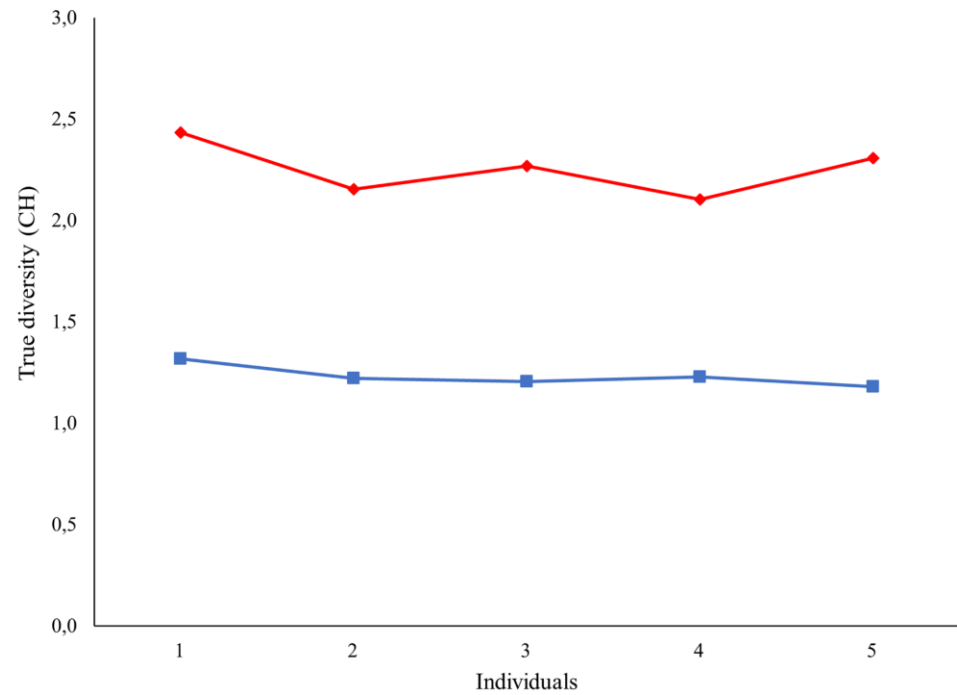**B**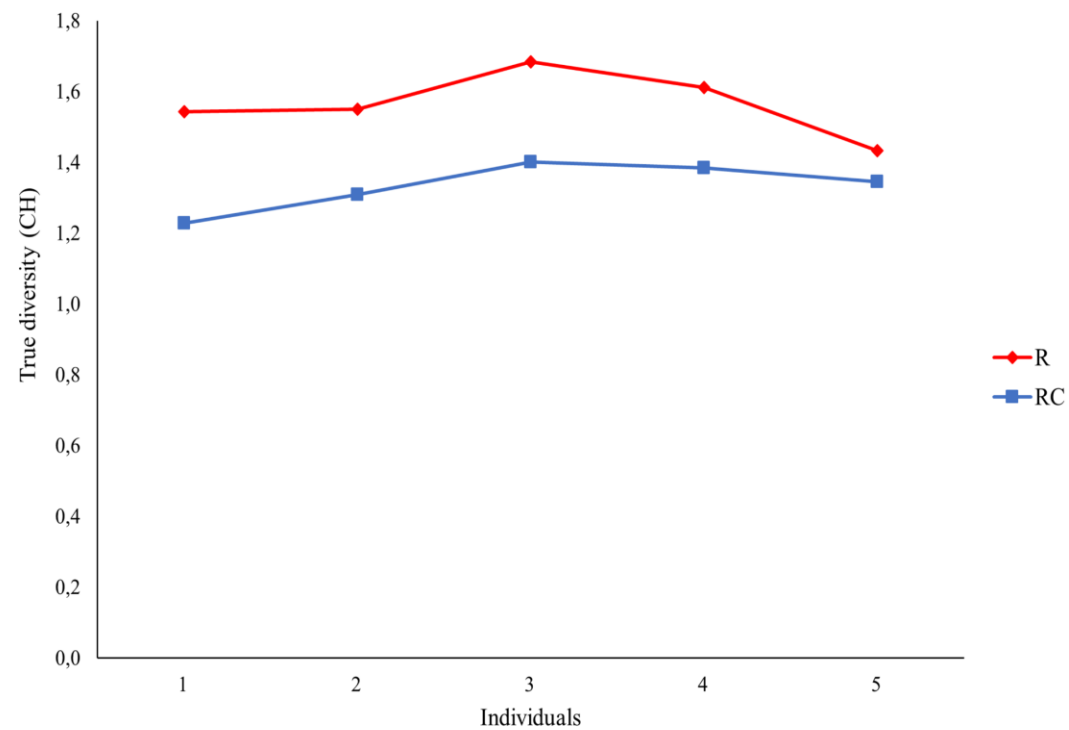

Supplement: Image1.pdf [file Image1.pdf]
